# Supplementary material for: Single-Cell Transcriptomic Profiling Unveils Dynamic Immune Cell Responses during Haemonchus contortus Infection
Source: MDPI journal article supplement (doi:10.3390/cells13100842), 2024-05-15
Supplement: s1 [file s1]

**Table S1.** Information of the cell suspension.

| Sample Name | Concentration (number/uL) | Viability (%) |
|-------------|---------------------------|---------------|
| C-1         | 2,846                     | 92%           |
| C-2         | 3,158                     | 90%           |
| T-1         | 3,351                     | 91%           |
| T-2         | 3,021                     | 94%           |

**Table S2.** Comparison before and after data quality control.

| Sample name | Cells number before filtration | Median genes before filtration | Cells number after filtration | Median genes after filtration |
|-------------|--------------------------------|--------------------------------|-------------------------------|-------------------------------|
| C-1         | 7,334                          | 1,382                          | 7,107                         | 1,394                         |
| C-2         | 8,345                          | 1,346                          | 8,041                         | 1,357                         |
| T-1         | 7,692                          | 1,356                          | 7,418                         | 1,366                         |
| T-2         | 8,385                          | 1,358                          | 7,865                         | 1,371                         |

**Table S3.** Proportion of different types of cells.

| Cell type   | Proportion of control group 1(%) | Proportion of control group 2(%) | Average proportion of control group (%) | Proportion of infection group 1(%) | Proportion of infection group 2(%) | Average proportion of infection group (%) |
|-------------|----------------------------------|----------------------------------|-----------------------------------------|------------------------------------|------------------------------------|-------------------------------------------|
| B           | 38.55%                           | 30.60%                           | 34.57%                                  | 33.73%                             | 25.97%                             | 29.85%                                    |
| CD4 T       | 31.23%                           | 36.39%                           | 33.81%                                  | 31.46%                             | 39.39%                             | 35.43%                                    |
| CD8 T       | 11.43%                           | 11.89%                           | 11.66%                                  | 16.97%                             | 15.15%                             | 16.06%                                    |
| Mono        | 9.78%                            | 10.79%                           | 10.29%                                  | 5.56%                              | 5.38%                              | 5.47%                                     |
| NK          | 3.25%                            | 4.75%                            | 4.00%                                   | 6.57%                              | 8.66%                              | 7.61%                                     |
| DCs         | 1.23%                            | 1.17%                            | 1.20%                                   | 0.83%                              | 0.76%                              | 0.80%                                     |
| Platelet    | 2.72%                            | 2.27%                            | 2.49%                                   | 2.88%                              | 2.47%                              | 2.67%                                     |
| Plasmablast | 1.81%                            | 2.15%                            | 1.98%                                   | 1.99%                              | 2.23%                              | 2.11%                                     |

**Table S4.** Sequences of oligonucleotide primers.

| Primer name | Gene name | Sequence (5'-3')           |
|-------------|-----------|----------------------------|
| β-actin-F   | β-actin   | CACCACACCTTCTACAAC         |
| β-actin-R   |           | TCTGGGTCATCTTCTCAC         |
| IL-4-F      | IL-4      | GTACCAGCCACTTCGTCCAT       |
| IL-4-R      |           | GCTGCTGAGATTCCTGTCAA       |
| IL-5-F      | IL-5      | CTGCCTATGTTTGTGCCAATGCT    |
| IL-5-R      |           | TTCCCATCACCTATCAGCAGAGTTTC |
| IL-6-F      | IL-6      | CTTCTGCTTTCCTACCCCG        |
| IL-6-R      |           | AGTAGTCTGCTTGGGGTGGT       |
| IL-10-F     | IL-10     | CCTTGTCGGAAATGATCCAG       |
| IL-10-R     |           | AGGGCAGAAAACGATGACAG       |
| IL-13-F     | IL-13     | GTGTCATCCAAAGGACCAAGAGG    |
| IL-13-R     |           | TCGGATGTACTCACTGGAACATG    |

**A**

nFeature\_RNA

nCount\_RNA

percent\_mito

C1 C2 T1 T2

Identity

nFeature\_RNA

nCount\_RNA

percent\_mito

C1 C2 T1 T2

Identity

**B**

Standardized Variance

Average Expression

LOC102170870

LOC102176353

JHNAH

LOC102185461

MZB1

C1R

C1GA

C1GC

LOC102168148

THBS1

LOC102177287

LOC102186629

S105A9

LOC108632412

PSLYR9P1

S105A3

LOC102186681

TIME2C

LOC102170319

VCAN

SIXRAB

CFD

FCN1

S105A4

LOC102168428

ANKK1

OSG-F13A1

TYROBP

AP1

VM

CD309

LOC102170870

LOC102176353

JHNAH

LOC102185461

MZB1

C1R

C1GA

C1GC

LOC102168148

THBS1

LOC102177287

LOC102186629

S105A9

LOC108632412

PSLYR9P1

S105A3

LOC102186681

TIME2C

LOC102170319

VCAN

SIXRAB

CFD

FCN1

S105A4

LOC102168428

ANKK1

OSG-F13A1

TYROBP

AP1

VM

CD309

LOC102170870

LOC102176353

JHNAH

LOC102185461

MZB1

C1R

C1GA

C1GC

LOC102168148

THBS1

LOC102177287

LOC102186629

S105A9

LOC108632412

PSLYR9P1

S105A3

LOC102186681

TIME2C

LOC102170319

VCAN

SIXRAB

CFD

FCN1

S105A4

LOC102168428

ANKK1

OSG-F13A1

TYROBP

AP1

VM

CD309

LOC102170870

LOC102176353

JHNAH

LOC102185461

MZB1

C1R

C1GA

C1GC

LOC102168148

THBS1

LOC102177287

LOC102186629

S105A9

LOC108632412

PSLYR9P1

S105A3

LOC102186681

TIME2C

LOC102170319

VCAN

SIXRAB

CFD

FCN1

S105A4

LOC102168428

ANKK1

OSG-F13A1

TYROBP

AP1

VM

CD309

LOC102170870

LOC102176353

JHNAH

LOC102185461

MZB1

C1R

C1GA

C1GC

LOC102168148

THBS1

LOC102177287

LOC102186629

S105A9

LOC108632412

PSLYR9P1

S105A3

LOC102186681

TIME2C

LOC102170319

VCAN

SIXRAB

CFD

FCN1

S105A4

LOC102168428

ANKK1

OSG-F13A1

TYROBP

AP1

VM

CD309

LOC102170870

LOC102176353

JHNAH

LOC102185461

MZB1

C1R

C1GA

C1GC

LOC102168148

THBS1

LOC102177287

LOC102186629

S105A9

LOC108632412

PSLYR9P1

S105A3

LOC102186681

TIME2C

LOC102170319

VCAN

SIXRAB

CFD

FCN1

S105A4

LOC102168428

ANKK1

OSG-F13A1

TYROBP

AP1

VM

CD309

LOC102170870

LOC102176353

JHNAH

LOC102185461

MZB1

C1R

C1GA

C1GC

LOC102168148

THBS1

LOC102177287

LOC102186629

S105A9

LOC108632412

PSLYR9P1

S105A3

LOC102186681

TIME2C

LOC102170319

VCAN

SIXRAB

CFD

FCN1

S105A4

LOC102168428

ANKK1

OSG-F13A1

TYROBP

AP1

VM

CD309

LOC102170870

LOC102176353

JHNAH

LOC102185461

MZB1

C1R

C1GA

C1GC

LOC102168148

THBS1

LOC102177287

LOC102186629

S105A9

LOC108632412

PSLYR9P1

S105A3

LOC102186681

TIME2C

LOC102170319

VCAN

SIXRAB

CFD

FCN1

S105A4

LOC102168428

ANKK1

OSG-F13A1

TYROBP

AP1

VM

CD309

LOC102170870

LOC102176353

JHNAH

LOC102185461

MZB1

C1R

C1GA

C1GC

LOC102168148

THBS1

LOC102177287

LOC102186629

S105A9

LOC108632412

PSLYR9P1

S105A3

LOC102186681

TIME2C

LOC102170319

VCAN

SIXRAB

CFD

FCN1

S105A4

LOC102168428

ANKK1

OSG-F13A1

TYROBP

AP1

VM

CD309

LOC102170870

LOC102176353

JHNAH

LOC102185461

MZB1

C1R

C1GA

C1GC

LOC102168148

THBS1

LOC102177287

LOC102186629

S105A9

LOC108632412

PSLYR9P1

S105A3

LOC102186681

TIME2C

LOC102170319

VCAN

SIXRAB

CFD

FCN1

S105A4

LOC102168428

ANKK1

OSG-F13A1

TYROBP

AP1

VM

CD309

LOC102170870

LOC102176353

JHNAH

LOC102185461

MZB1

C1R

C1GA

C1GC

LOC102168148

THBS1

LOC102177287

LOC102186629

S105A9

LOC108632412

PSLYR9P1

S105A3

LOC102186681

TIME2C

LOC102170319

VCAN

SIXRAB

CFD

FCN1

S105A4

LOC10

**Figure S1.** Data filtering, dimensionality reduction and identification of highly variable genes (A) Number of genes, counts, and mitochondrial gene ratio before and after data filtering; (B) The top 2000 highly variable genes; (C) The elbow plot.

**Figure S2** The proportion of cell subpopulations and changes in cell cycle

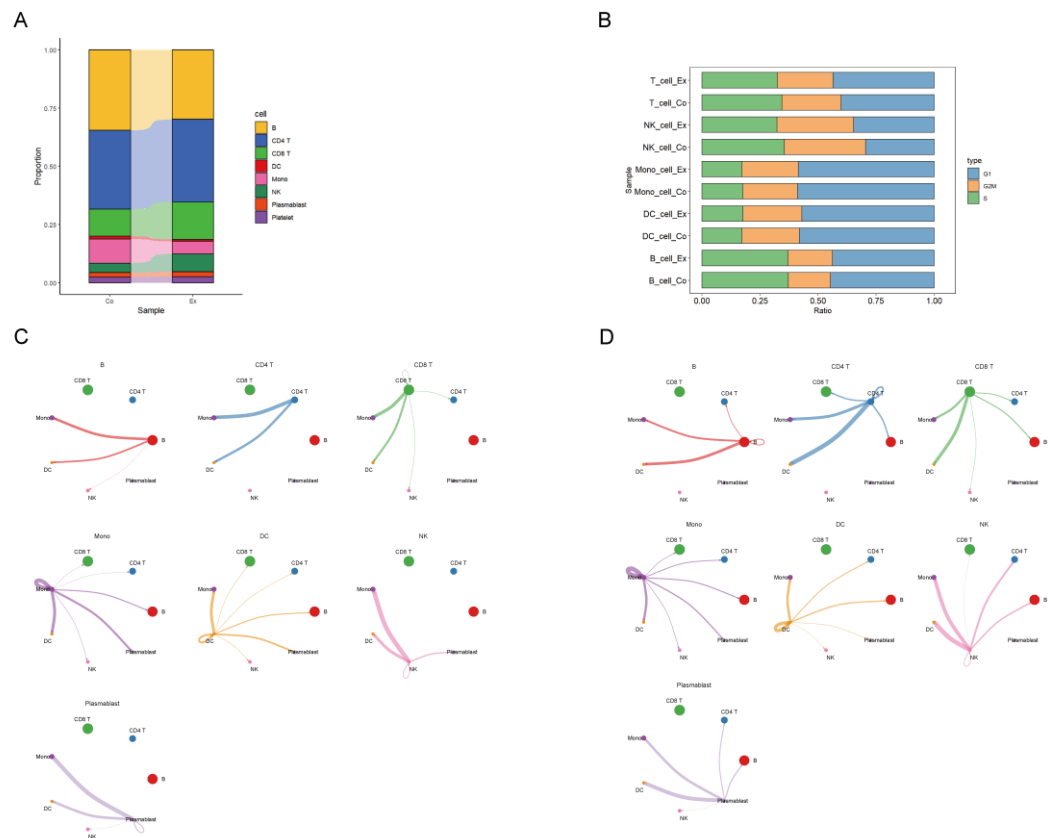

**Figure S2.** The proportion of cell subpopulations and changes in cell cycle. (A) Changes in the proportion of cell subpopulations; (B) The cell subpopulation cycle changes. (C) The number of cell communication in each subpopulation of the control group; (D) The number of cell communication in each subpopulation of the case group.
